# Supplementary material for: Crop Rotation Practiced by Romanian Crop Farms before the Introduction of the “Environmentally Beneficial Practices Applicable to Arable Land” Eco-Scheme
Source: MDPI journal article supplement (doi:10.3390/agronomy13082086), 2023-08-08
Supplement: s1 [file s1]

|  |  |  |  |           |      |              |       |
|--|--|--|--|-----------|------|--------------|-------|
|  |  |  |  |           |      | wheat        |       |
|  |  |  |  |           |      | Winter wheat | 3.74  |
|  |  |  |  | Sunflower | 1.1  | Winter wheat | 1.77  |
|  |  |  |  | Sunflower | 1.44 | Winter wheat | 1.44  |
|  |  |  |  | Sunflower | 1.02 | Winter wheat | 0.9   |
|  |  |  |  |           |      | Winter wheat | 29.03 |
|  |  |  |  |           |      | Winter wheat | 4.54  |
|  |  |  |  |           |      | Winter wheat | 1.01  |
|  |  |  |  |           |      | Winter wheat | 0.97  |
|  |  |  |  |           |      | Winter wheat | 0.37  |
|  |  |  |  |           |      | Winter wheat | 0.82  |
|  |  |  |  |           |      | Winter wheat | 0.21  |
|  |  |  |  |           |      | Winter wheat | 0.15  |
|  |  |  |  |           |      | Winter wheat | 2.82  |
|  |  |  |  |           |      | Winter wheat | 0.2   |
|  |  |  |  |           |      | Winter wheat | 0.42  |
|  |  |  |  |           |      | Winter wheat | 0.37  |
|  |  |  |  |           |      | Winter wheat | 0.7   |
|  |  |  |  |           |      | Winter wheat | 0.2   |
|  |  |  |  |           |      | Winter wheat | 0.37  |

**Table S2** Maize crop rotation per existing plot in 2022 (Farm C)  
Agricultural year

| 2019         |               | 2020         |               | 2021         |               | 2022  |               |
|--------------|---------------|--------------|---------------|--------------|---------------|-------|---------------|
| Crop         | Area<br>-ha - | Crop         | Area<br>-ha - | Crop         | Area<br>-ha - | Crop  | Area<br>-ha - |
| Maize        | 25.87         | Winter wheat | 25.87         | Soybean      | 18.87         | Maize | 18.78         |
| Maize        | 1.63          | Winter wheat | 1.63          | Soybean      | 8.73          | Maize | 8.73          |
| Maize        | 28            | Winter wheat | 28            | Soybean      | 31.68         | Maize | 31.68         |
| Winter wheat | 58.7          | Rapeseed     | 58.7          | Maize        | 57.94         | Maize | 57.94         |
| Soybean      | 25.75         | Maize        | 25.75         | Soybean      | 27.53         | Maize | 27.53         |
| Soybean      | 67.01         | Maize        | 124.07        | Soybean      | 123.69        | Maize | 123.6         |
| Soybean      | 4.27          | Maize        | 4.27          | Soybean      | 5.02          | Maize | 5.02          |
| Maize        | 44.41         | Winter wheat | 44.41         | Soybean      | 45.51         | Maize | 54.76         |
| Maize        | 37.72         | Winter wheat | 37.72         | Soybean      | 37.22         | Maize | 37.17         |
| Soybean      | 44.98         | Maize        | 44.98         | Winter wheat | 44.21         | Maize | 44.21         |
| Soybean      | 27.01         | Maize        | 32.96         | Winter wheat | 19.3          | Maize | 33.71         |

|          |       |               |       |          |        |       |       |
|----------|-------|---------------|-------|----------|--------|-------|-------|
| Soybean  | 48.16 | Maize         | 48.16 | Soybean  | 49.55  | Maize | 49.55 |
| Soybean  | 9.18  | Maize         | 9.18  | Soybean  | 8.47   | Maize | 8.47  |
| Rapeseed | 52.55 | Winter barley | 52.55 | Soybean  | 56.65  | Maize | 56.65 |
| Maize    | 48.28 | Winter wheat  | 48.28 | Soybean  | 47.03  | Maize | 47.03 |
|          |       | Winter wheat  | 22.72 | Rapeseed | 50.93  | Maize | 56.98 |
|          |       | Soybean       | 98.68 | Maize    | 118.02 | Maize | 53.57 |
|          |       |               |       | Soybean  | 28.79  | Maize | 33.4  |

**Table S3** Sunflower crop rotation on existing plots in 2022 (Farm C)

| Agricultural year |           |              |           |               |           |           |           |
|-------------------|-----------|--------------|-----------|---------------|-----------|-----------|-----------|
| 2019              |           | 2020         |           | 2021          |           | 2022      |           |
| Crop              | Area –ha- | Crop         | Area –ha- | Crop          | Area –ha- | Crop      | Area –ha- |
| Winter wheat      | 67.23     | Rapeseed     | 67.23     | Winter barley | 10.48     | Sunflower | 11.34     |
|                   |           |              |           | Winter barley | 9.17      | Sunflower | 8.81      |
| Winter barley     | 20.71     | Rapeseed     | 20.71     | Winter barley | 20.7      | Sunflower | 20.71     |
|                   |           |              |           | Winter wheat  | 18.33     | Sunflower | 18.4      |
|                   |           |              |           | Winter wheat  | 87.59     | Sunflower | 87.56     |
| Winter wheat      | 1.56/1.84 | Rapeseed     | 1.56      | Winter wheat  | 1.84      | Sunflower | 1.84      |
| Winter wheat      | 15.78     | Rapeseed     | 15.78     | Winter barley | 15.78     | Sunflower | 15.78     |
| Winter wheat      | 14        | Rapeseed     | 15.1      | Winter wheat  | 13.45     | Sunflower | 13.45     |
| Winter wheat      | 15.82     |              |           |               |           | Sunflower | 3.25      |
| Winter wheat      | 1.67      | Rapeseed     | 1.05      | Winter wheat  | 1.65      | Sunflower | 1.64      |
| Winter wheat      | 1.45      | Rapeseed     | 0.95      | Rapeseed      | 1.41      | Sunflower | 1.54      |
| Winter wheat      | 0.46      | Rapeseed     | 0.37      | Winter wheat  | 0.3       | Sunflower | 0.3       |
| Winter wheat      | 30.22     | Sunflower    | 30.22     | Winter barley | 30.22     | Sunflower | 30.22     |
| Winter wheat      | 236.4     | Sunflower    | 236.41    | Winter wheat  | 223.41    | Sunflower | 188.59    |
| Winter wheat      | 13.93     | Sunflower    | 13.92     | Rapeseed      | 13.84     | Sunflower | 13.84     |
| Winter wheat      | 0.68      | Rapeseed     | 0.68      | Winter wheat  | 0.75      | Sunflower | 0.75      |
| Sunflower         | 6.94      | Rapeseed     | 6.94      | Winter wheat  | 7.27      | Sunflower | 7.27      |
| Winter wheat      | 5.13      | Sunflower    | 5.13      | Winter wheat  | 5.06      | Sunflower | 5.06      |
| Winter wheat      | 25.65     | Maize        | 25.65     | Rapeseed      | 25.58     | Sunflower | 25.58     |
| Winter wheat      | 4.25      | Rapeseed     | 4.25      | Winter wheat  | 4.31      | Sunflower | 4.31      |
| Winter wheat      | 0.51      | Rapeseed     | 0.51      | Winter wheat  | 0.5       | Sunflower | 0.5       |
| Winter wheat      | 0.2       | Winter wheat | 0.2       | Winter wheat  | 0.2       | Sunflower | 0.2       |
|                   |           | Winter wheat | 0.6       | Winter wheat  | 0.47      | Sunflower | 0.47      |
|                   |           | Winter wheat | 1.1       | Winter wheat  | 1.1       | Sunflower | 1.1       |
|                   |           |              |           | Winter wheat  | 3.2       | Sunflower | 3.2       |
|                   |           |              |           | Winter wheat  | 25.15     | Sunflower | 2.25      |
|                   |           |              |           | Winter wheat  | 0.89      | Sunflower | 0.89      |
|                   |           |              |           | Winter wheat  | 0.3       | Sunflower | 0.3       |
|                   |           |              |           |               |           | Sunflower | 6.18      |
|                   |           |              |           |               |           | Sunflower | 10.52     |
|                   |           |              |           |               |           | Sunflower | 0.5       |
|                   |           |              |           |               |           | Sunflower | 0.4       |
|                   |           |              |           |               |           | Sunflower | 0.2       |
|                   |           |              |           |               |           | Sunflower | 0.48      |

|  |  |  |  |  |  |           |      |
|--|--|--|--|--|--|-----------|------|
|  |  |  |  |  |  | Sunflower | 0.33 |
|  |  |  |  |  |  | Sunflower | 0.87 |
|  |  |  |  |  |  | Sunflower | 0.4  |
|  |  |  |  |  |  | Sunflower | 0.31 |
|  |  |  |  |  |  | Sunflower | 0.48 |
|  |  |  |  |  |  | Sunflower | 2.84 |
|  |  |  |  |  |  | Sunflower | 1.07 |
|  |  |  |  |  |  | Sunflower | 0.69 |
|  |  |  |  |  |  | Sunflower | 0.45 |
|  |  |  |  |  |  | Sunflower | 0.26 |
|  |  |  |  |  |  | Sunflower | 1.17 |
|  |  |  |  |  |  | Sunflower | 0.38 |
|  |  |  |  |  |  | Sunflower | 0.44 |
|  |  |  |  |  |  | Sunflower | 0.74 |

**Table S4** Rotation of rapeseed on existing plots in 2022 (Farm C)

| Agricultural year |               |           |               |              |               |          |               |
|-------------------|---------------|-----------|---------------|--------------|---------------|----------|---------------|
| 2019              |               | 2020      |               | 2021         |               | 2022     |               |
| Crop              | Area<br>-ha - | Crop      | Area<br>-ha - | Crop         | Area<br>-ha - | Crop     | Area<br>-ha - |
| Maize             | 27.18         | Sunflower | 27.18         | Winter wheat | 27.18         | Rapeseed | 27.18         |
|                   |               |           |               |              |               | Rapeseed | 34.82         |
| Maize             | 66.14         | Maize     | 65.62         | Winter wheat | 29.5          | Rapeseed | 29.5          |
| Winter wheat      | 10.01         | Sunflower | 10.01         | Winter wheat | 10.5          | Rapeseed | 23.53         |
|                   |               |           |               | Winter wheat | 53.72         | Rapeseed | 17.26         |
|                   |               |           |               | Winter wheat | 39.44         | Rapeseed | 39.48         |
|                   |               |           |               |              |               | Rapeseed | 19.1          |
|                   |               |           |               |              |               | Rapeseed | 2.05          |

**Table S5** Soybean crop rotation on existing plots in 2022 (Farm C)

[illegible]
